# Supplementary material for: KDM4B, a potential prognostic biomarker revealed by large-scale public databases and clinical samples in uterine corpus endometrial carcinoma
Source: Royal Society of Chemistry journal article supplement (doi:10.1039/d1mo00287b), 2022-04-05
Supplement: d1mo00287b5.pdf [file d1mo00287b5.pdf]

**Table S1. Univariate survival analysis of OS and PFS in 126 patients with UCEC**

| Variables              | No. Patients | OS          |               |       |                     | PFS                   |               |       |                      |
|------------------------|--------------|-------------|---------------|-------|---------------------|-----------------------|---------------|-------|----------------------|
|                        |              | (n=126)     | Mean $\pm$ SE | 95%CI | Estimated 5-y OS, % | <i>P</i> <sup>a</sup> | Mean $\pm$ SE | 95%CI | Estimated 5-y DFS, % |
| Age at diagnosis, y    |              |             |               |       | 0.552               |                       |               |       | 0.557                |
| $\leq$ 55              | 60           | 62 $\pm$ 2  | 35-89         | 88.3  |                     | 62 $\pm$ 2            | 32-92         | 90.0  |                      |
| $>$ 55                 | 66           | 62 $\pm$ 2  | 35-89         | 84.8  |                     | 61 $\pm$ 2            | 31-91         | 84.8  |                      |
| Histological type      |              |             |               |       | 0.185               |                       |               |       | 0.182                |
| Endometrioid           | 113          | 63 $\pm$ 1  | 37-89         | 89.4  |                     | 62 $\pm$ 1            | 33-91         | 89.4  |                      |
| Nonendometrioid        | 13           | 57 $\pm$ 5  | 25-89         | 61.5  |                     | 54 $\pm$ 5            | 18-90         | 69.2  |                      |
| FIGO stage             |              |             |               |       | <b>0.003</b>        |                       |               |       | <b>0.003</b>         |
| I                      | 88           | 64 $\pm$ 1  | 45-83         | 90.9  |                     | 64 $\pm$ 1            | 41-87         | 92.0  |                      |
| II                     | 16           | 60 $\pm$ 4  | 30-90         | 81.2  |                     | 59 $\pm$ 4            | 25-93         | 81.2  |                      |
| III                    | 18           | 60 $\pm$ 4  | 29-91         | 77.8  |                     | 58 $\pm$ 4            | 22-94         | 77.8  |                      |
| IV                     | 4            | 36 $\pm$ 17 | (-29-101)     | 50.0  |                     | 36 $\pm$ 17           | (-29-101)     | 50.0  |                      |
| Histological grade     |              |             |               |       | 0.630               |                       |               |       | 0.620                |
| G1                     | 56           | 65 $\pm$ 1  | 48-82         | 91.1  |                     | 64 $\pm$ 2            | 42-86         | 91.1  |                      |
| G2                     | 41           | 61 $\pm$ 2  | 32-90         | 82.9  |                     | 60 $\pm$ 3            | 27-93         | 82.9  |                      |
| G3                     | 29           | 65 $\pm$ 1  | 48-82         | 91.1  |                     | 64 $\pm$ 2            | 42-86         | 91.1  |                      |
| Depth of invasion      |              |             |               |       | 0.070               |                       |               |       | 0.067                |
| $<$ 1/2 muscular layer | 69           | 64 $\pm$ 1  | 48-80         | 91.3  |                     | 64 $\pm$ 1            | 44-84         | 91.3  |                      |
| $>$ 1/2 muscular layer | 57           | 60 $\pm$ 2  | 25-95         | 80.7  |                     | 58 $\pm$ 3            | 21-95         | 82.5  |                      |
| Lymph node metastasis  |              |             |               |       | <b>0.047</b>        |                       |               |       | <b>0.047</b>         |
| No                     | 116          | 63 $\pm$ 1  | 39-87         | 87.9  |                     | 62 $\pm$ 1            | 35-89         | 88.8  |                      |
| Yes                    | 10           | 53 $\pm$ 8  | 6-100         | 70.0  |                     | 52 $\pm$ 8            | 4-100         | 70.0  |                      |
| KDM4B                  |              |             |               |       | <b>&lt;0.001</b>    |                       |               |       | <b>&lt;0.001</b>     |
| Low expression         | 65           | 67 $\pm$ 1  | 57-77         | 98.5  |                     | 67 $\pm$ 1            | 53-81         | 98.5  |                      |
| High expression        | 61           | 57 $\pm$ 2  | 23-91         | 73.8  |                     | 56 $\pm$ 2            | 19-93         | 75.4  |                      |

**Notes:** Log-rank test.
